# Supplementary material for: Using Automated Speech Processing for Repeated Measurements in a Clinical Setting of the Behavioral Variability in the Stroop Task
Source: MDPI journal article supplement (doi:10.3390/brainsci13030442), 2023-03-04

## Supplemental Materials

Figure S1 Panel A. Histogram of sessions completed for nonpatients.

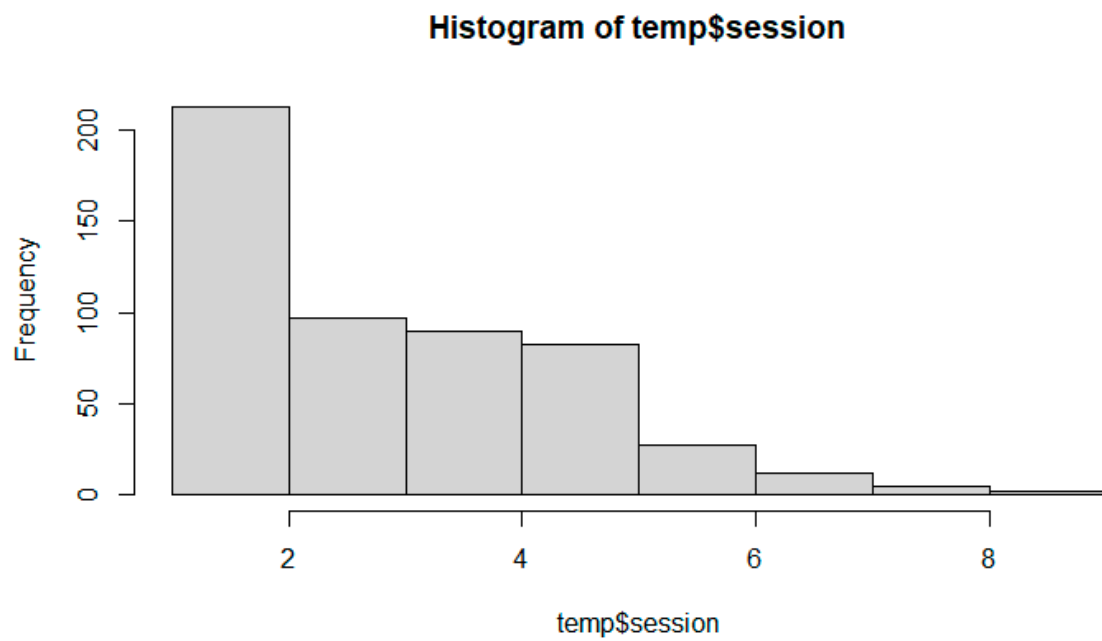

Figure S1 Panel B. Histogram of sessions completed for patients.

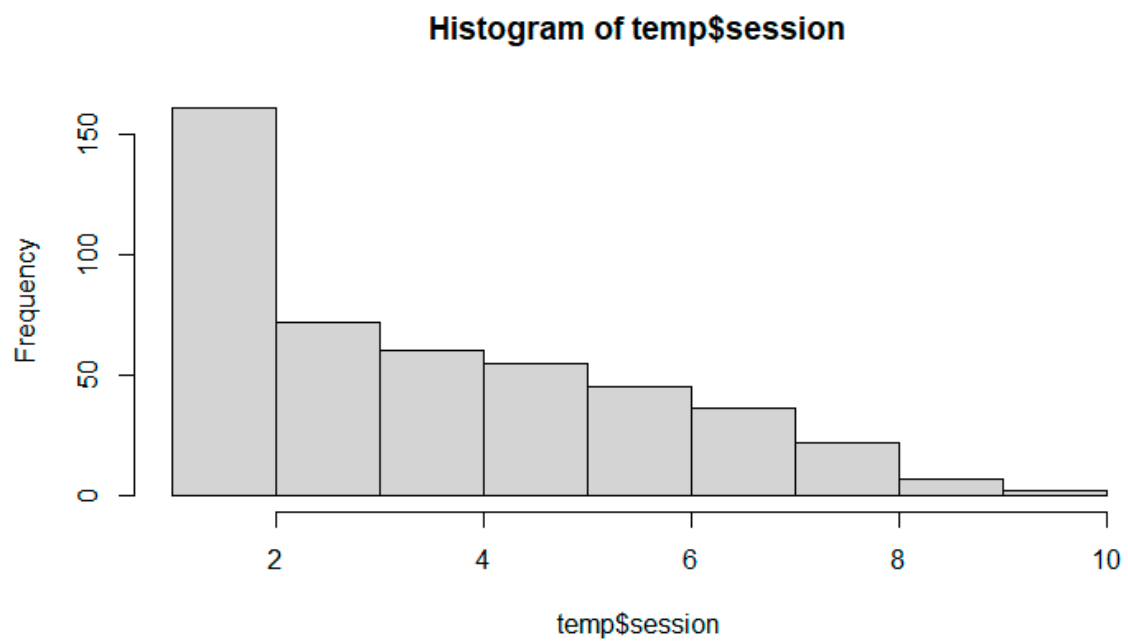

Figure S2 Panel A. Zero-order correlation plot of Stroop features for nonpatients

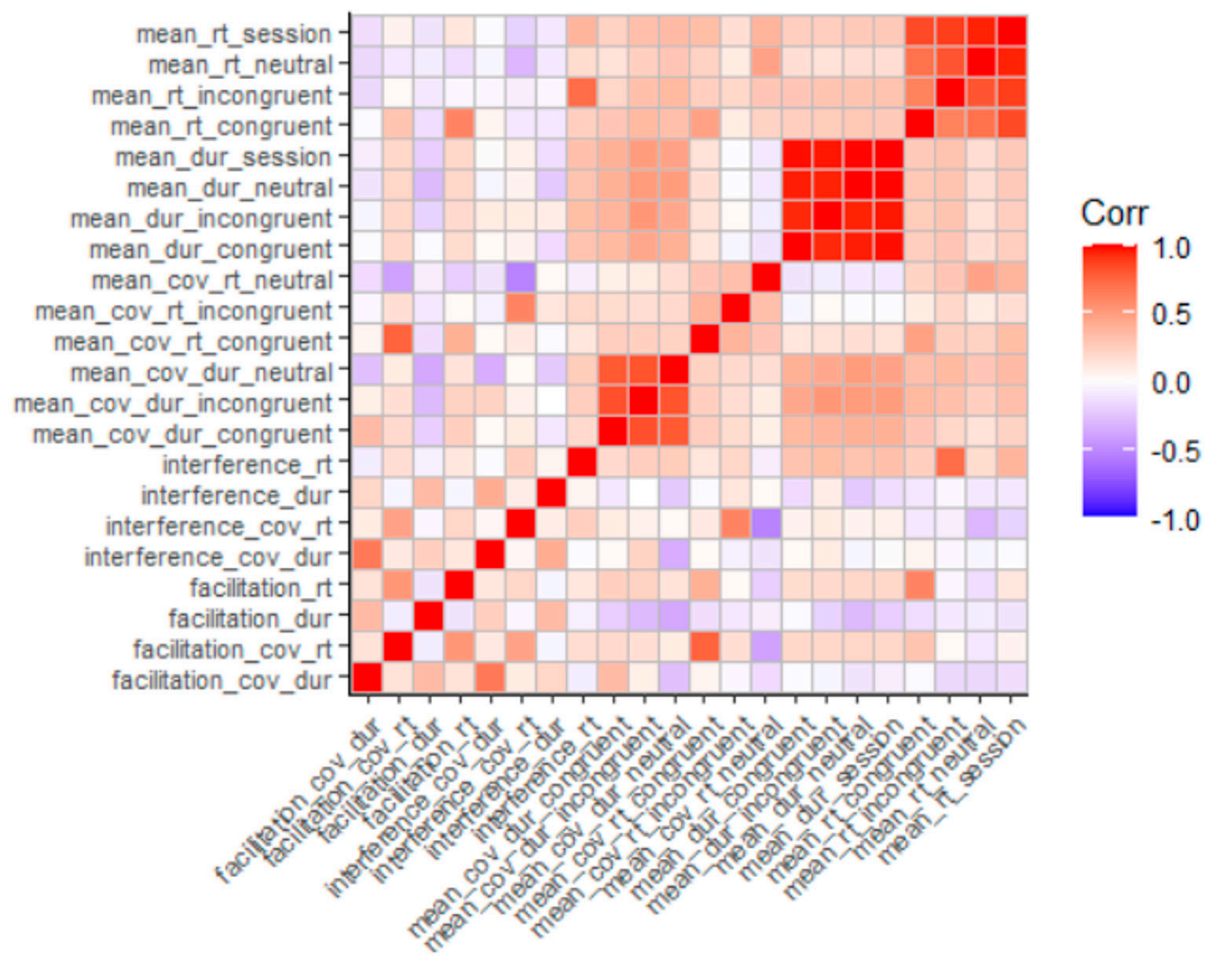

Figure S2 Panel B. Zero-order correlation plot of Stroop features for patients

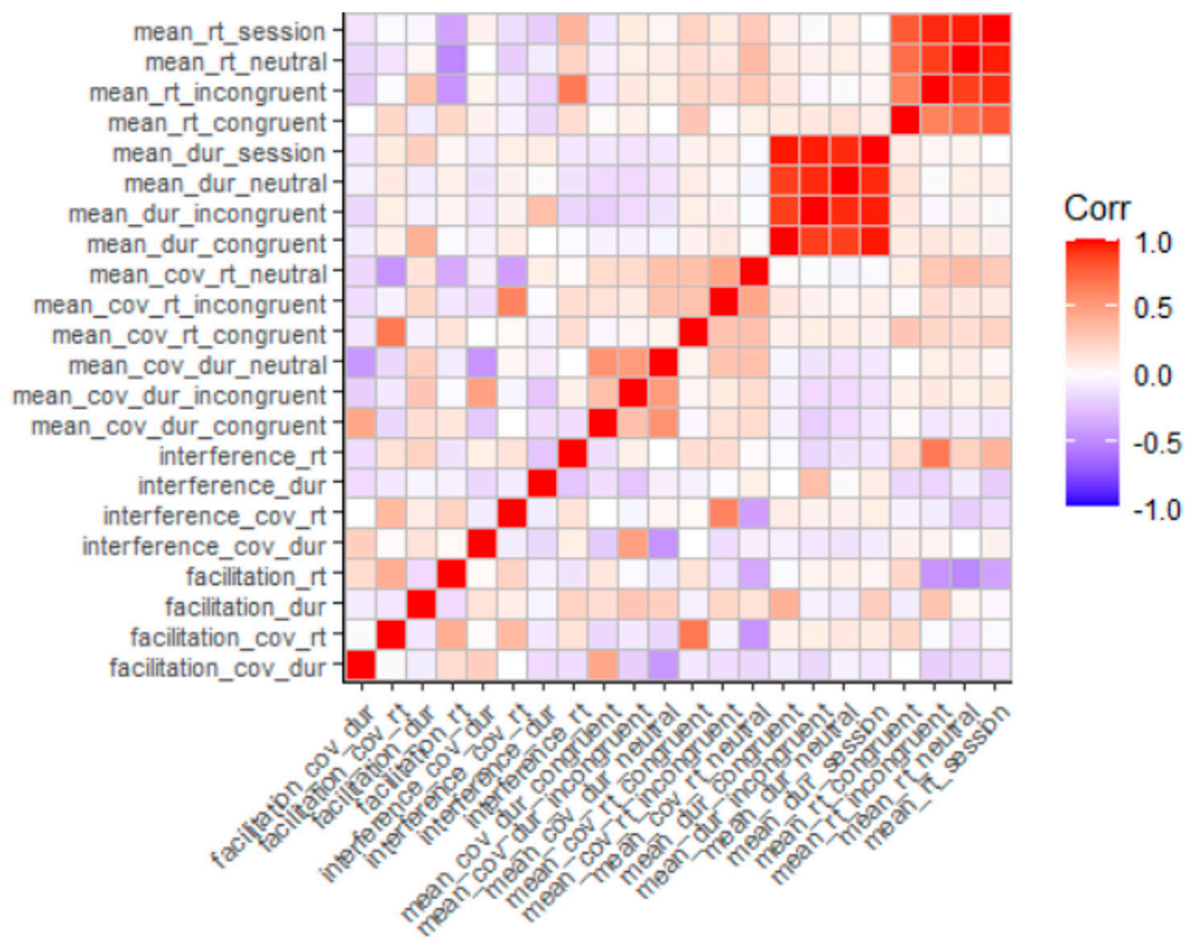

Supplement: s1 [file s1]
